# Supplementary material for: Facile and creative design of hierarchical vanadium oxides@graphene nanosheet patterns
Source: Royal Society of Chemistry journal article supplement (doi:10.1039/c5ra25521j), 2016-01-01
Supplement: c5ra25521j1.pdf [file c5ra25521j1.pdf]

Supplementary Information

to

**Facile and creative design of hierarchical  
vanadium oxides@graphene nanosheets  
patterns**

Jiucun Chen,<sup>\*ab</sup> Wenjun Li,<sup>ab</sup> Jian Jiang,<sup>ab</sup> Chao Wu,<sup>ab</sup> Yinqin Liu<sup>ab</sup>

<sup>a</sup> *Institute for Clean Energy & Advanced Materials, Faculty of Materials and Energy,  
Southwest University,*

<sup>b</sup> *Chongqing Key Laboratory for Advanced Materials & Technologies of Clean Energies,  
Chongqing 400715, P.R. China*

---

Correspondence: [chenjc@swu.edu.cn](mailto:chenjc@swu.edu.cn)

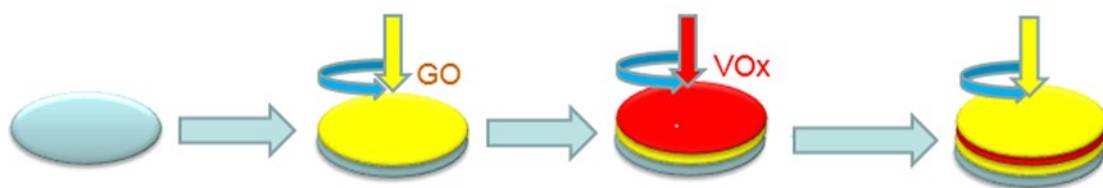

**Fig S1.** The procedure of synthesis the multi-layer GNS/VO<sub>x</sub> cathode materials by spin coating briefly.

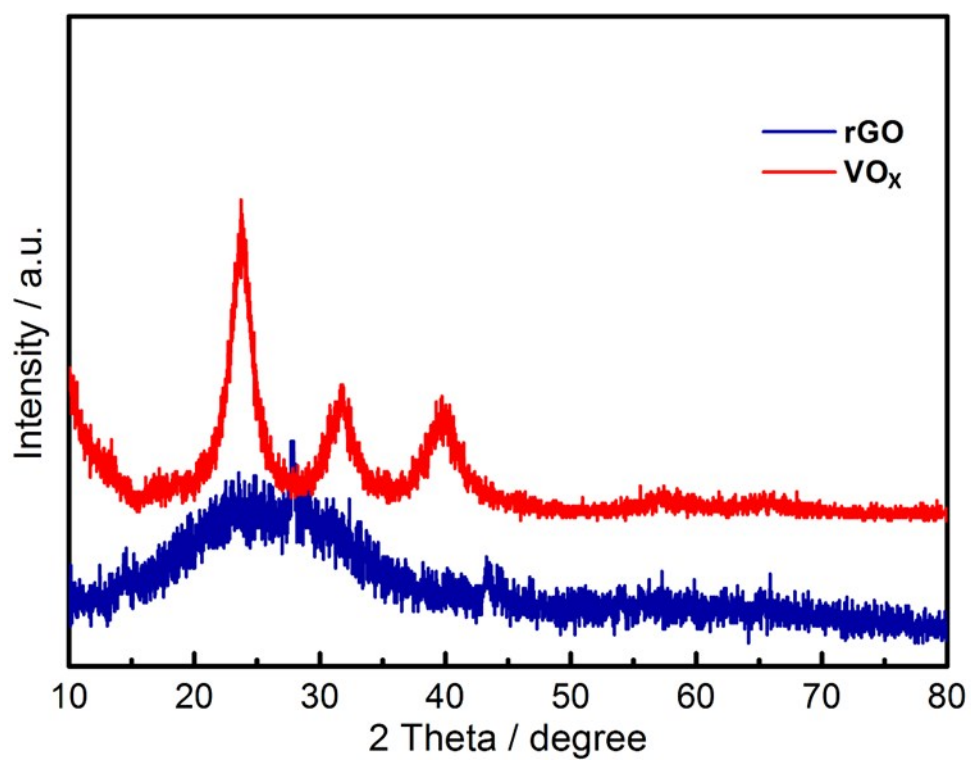

**Fig. S2** XRD patterns of VO<sub>x</sub> without annealing and reduced GO which annealed at 500 °C.

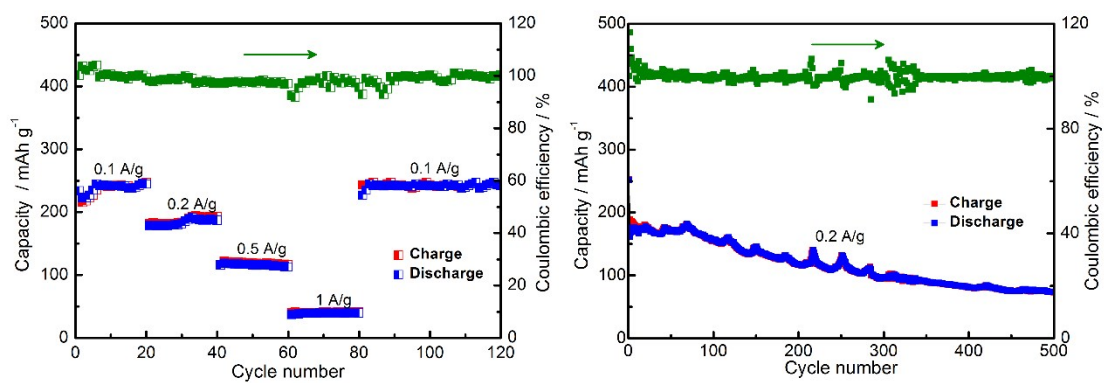

**Fig. S3** Performance of 3-layer VO<sub>x</sub> without GNS cathode materials. (a) Rate performance of 3-layer VO<sub>x</sub> in the voltage range of 2.0-4.5 V versus Na/Na<sup>+</sup>; (b) Long-term cycling performance of 3-layer VO<sub>x</sub> electrode at a current density of 0.2 A/g in the voltage range of 2.0-4.5 V versus Na/Na<sup>+</sup>.

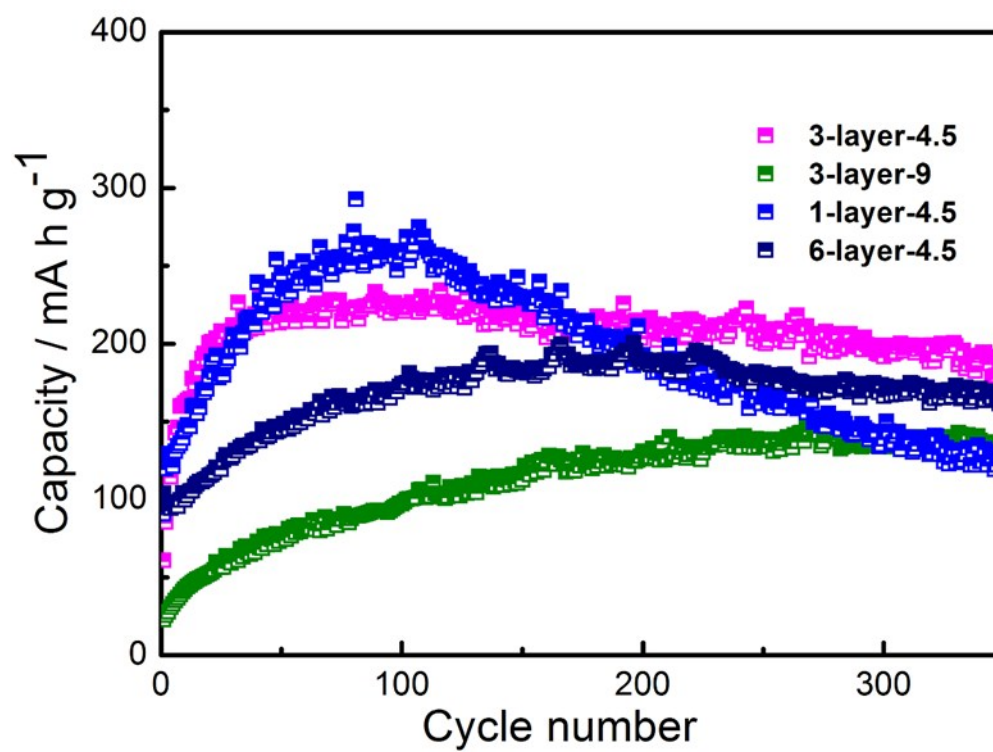

**Fig. S4** Cycling performance for four types of multi-layer electrode with different GO concentrate in the voltage range of 2.0-4.5 V versus Na/Na<sup>+</sup>.

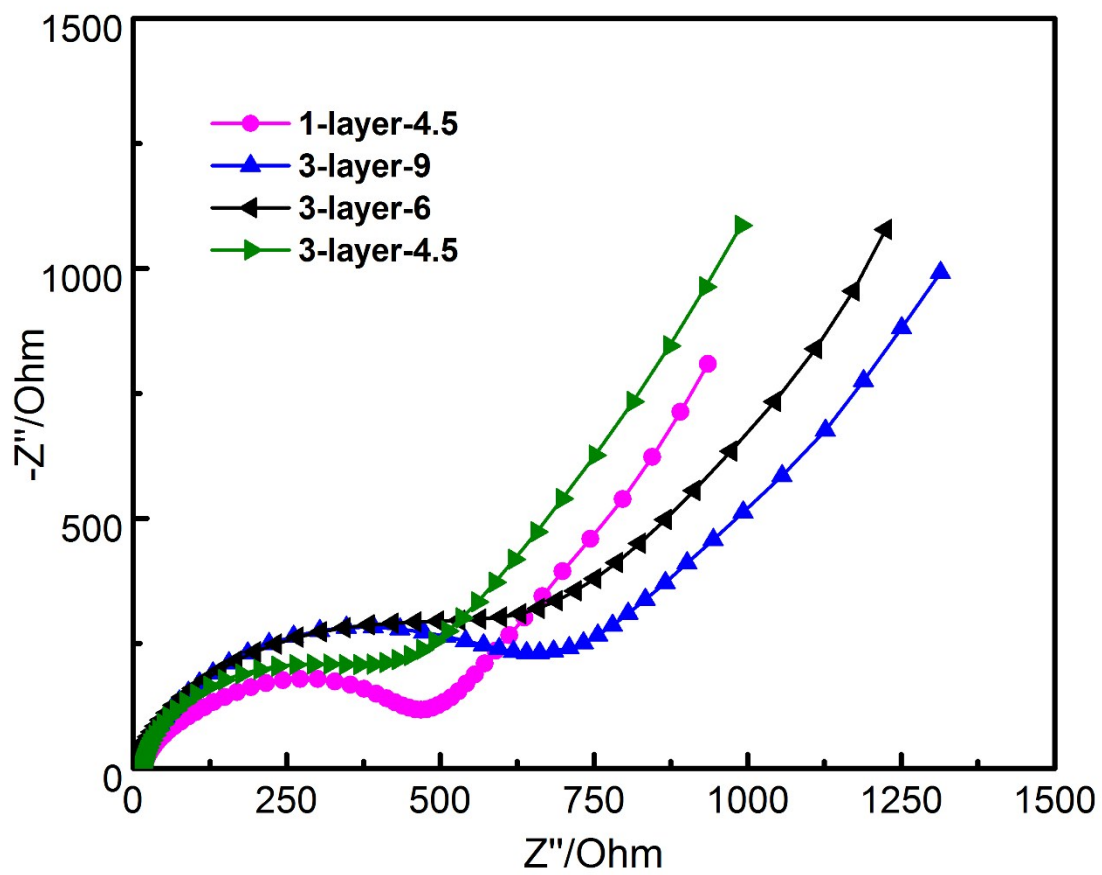

**Fig. S5** Electrochemical impedance spectroscopy of multi-layer electrodes with different GO's concentration.

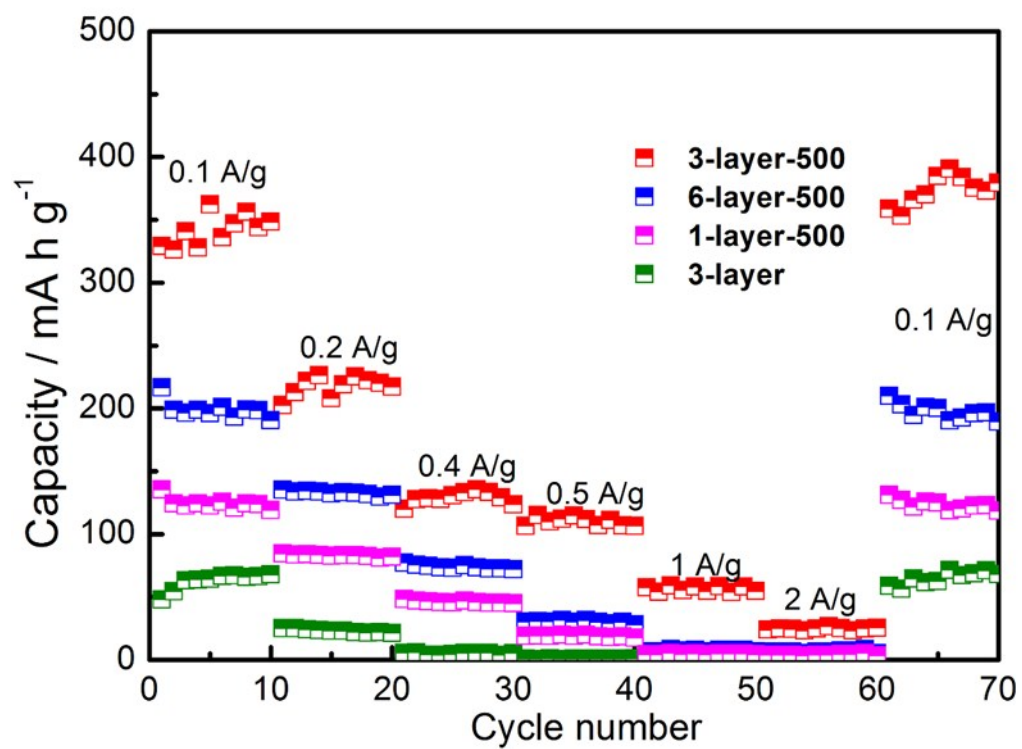

**Fig. S6** Rate performance for four types of multi-layer electrode with different layer in the voltage range of 2.0-4.5 V versus Na/Na<sup>+</sup>.
